# Supplementary material for: A new oncolytic Vaccinia virus augments antitumor immune responses to prevent tumor recurrence and metastasis after surgery
Source: PubMed Central journal article supplement (PMC7206973; doi:10.1136/jitc-2019-000415), 2020-03-26

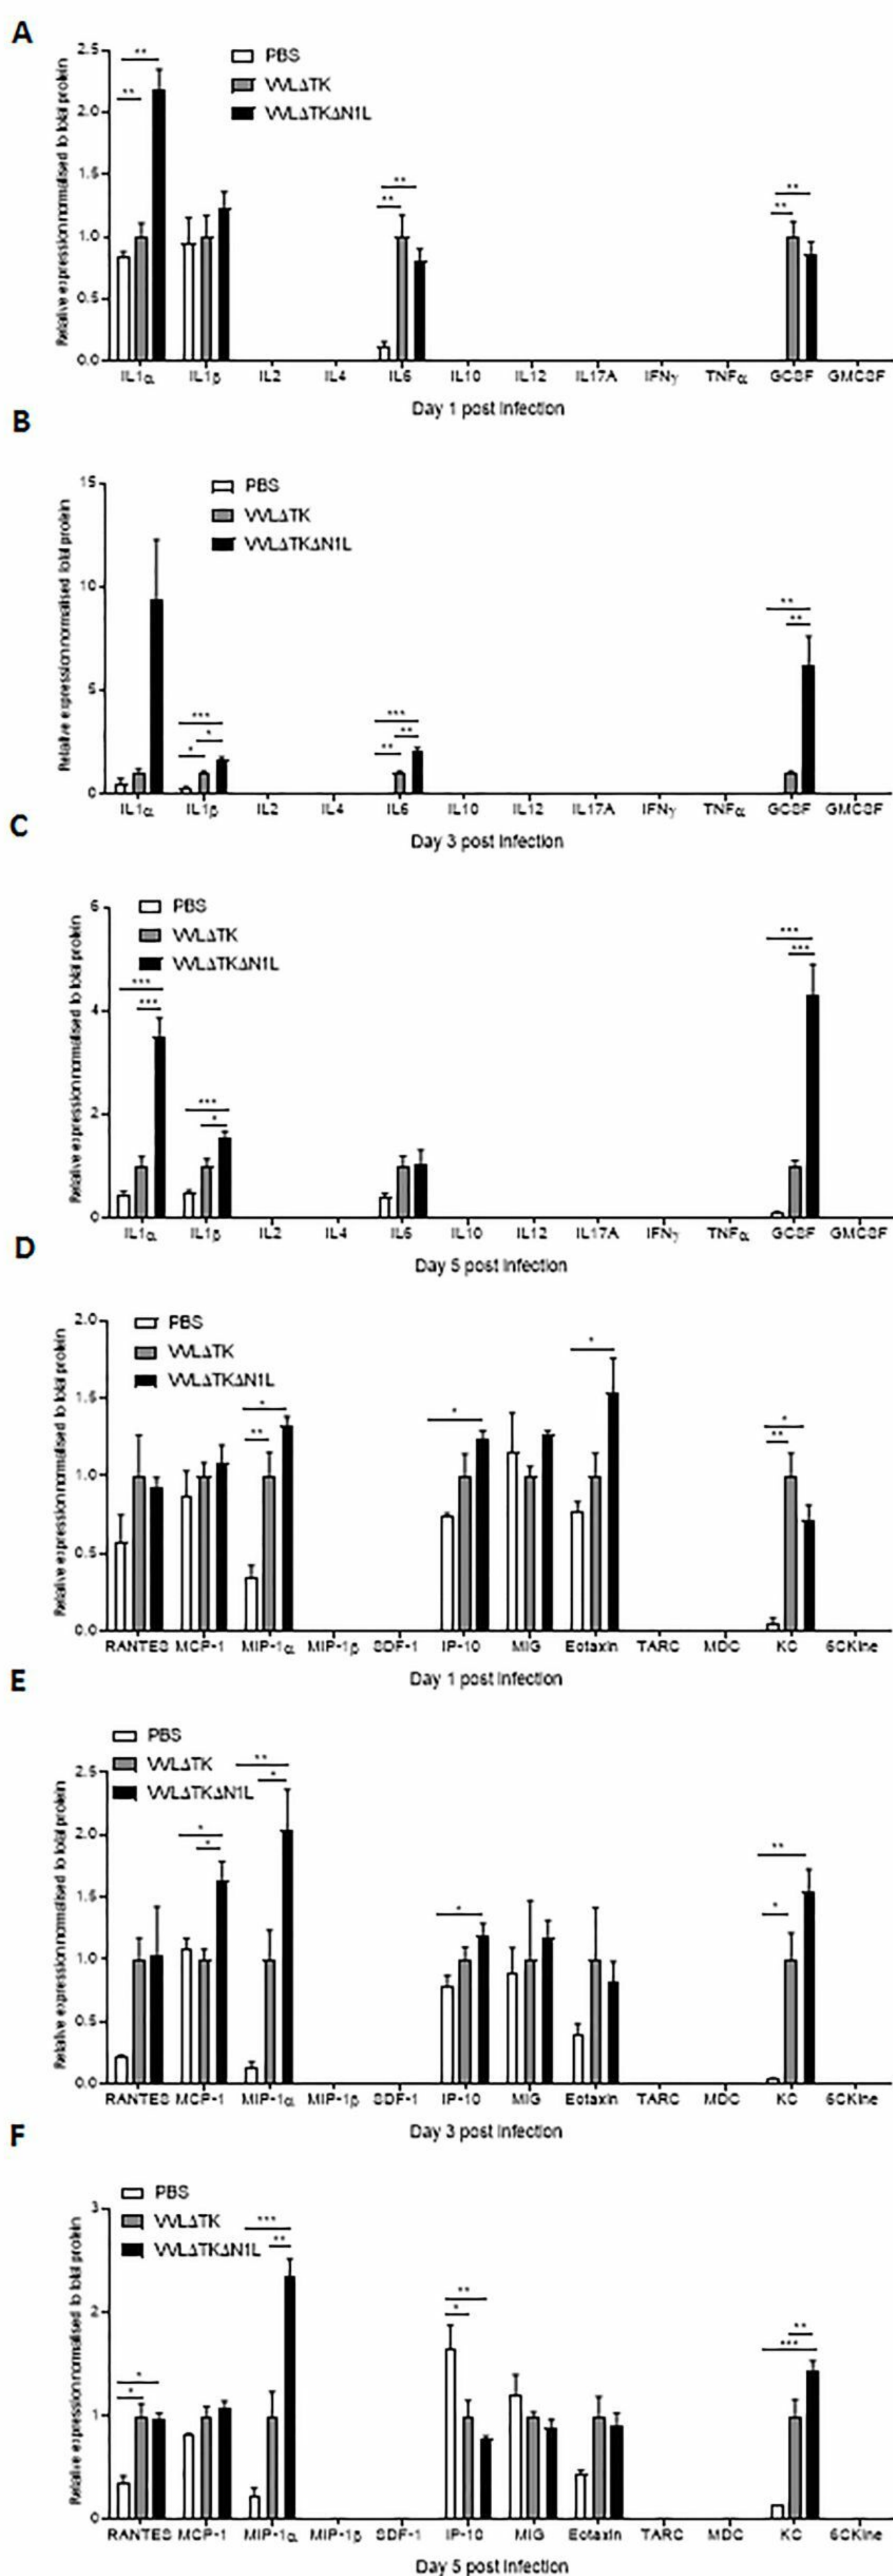

Supplement: jitc-2019-000415supp003.pdf [file jitc-2019-000415supp003.pdf]
